# Supplementary material for: Double antithrombotic therapy for prevention of bleeding and ischemic events after percutaneous coronary intervention in patients with atrial fibrillation: A meta-analysis
Source: PubMed Central journal article supplement — Medicine (Baltimore). 2021 Jan 8;100(1):e24188. doi: 10.1097/MD.0000000000024188 (PMC7793444; doi:10.1097/md.0000000000024188), 2021-01-08

**Figure S1** Funnel plot and Egger test for clinically significant bleeding in the subgroup of (Sex: Male)

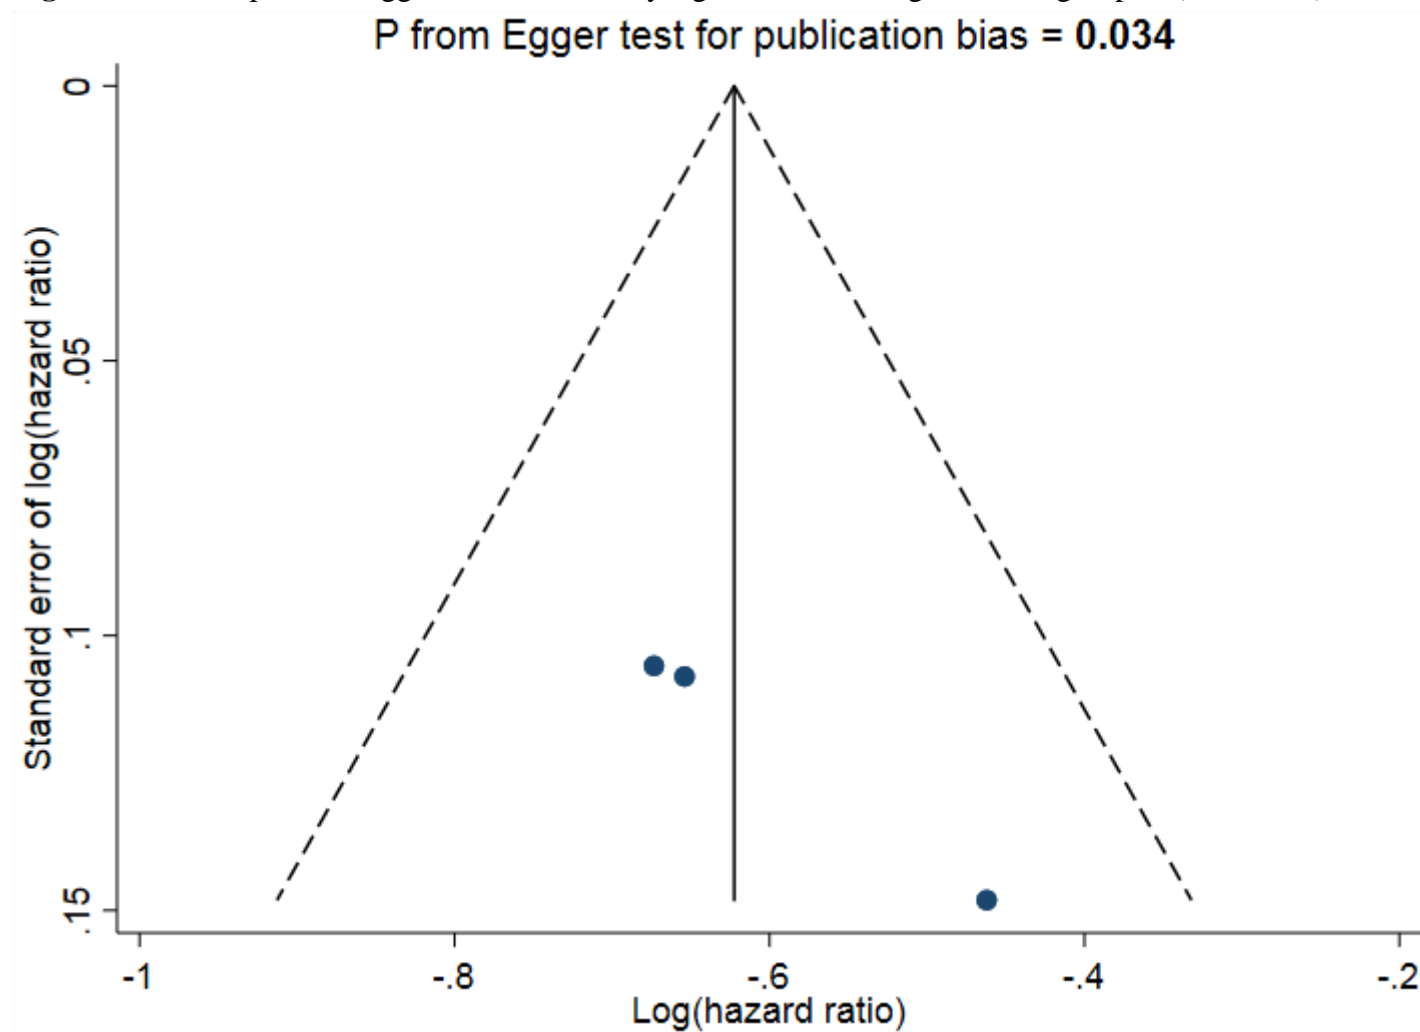

**Figure S2** Funnel plot and Egger test for clinically significant bleeding in the subgroup of (Sex: Female)

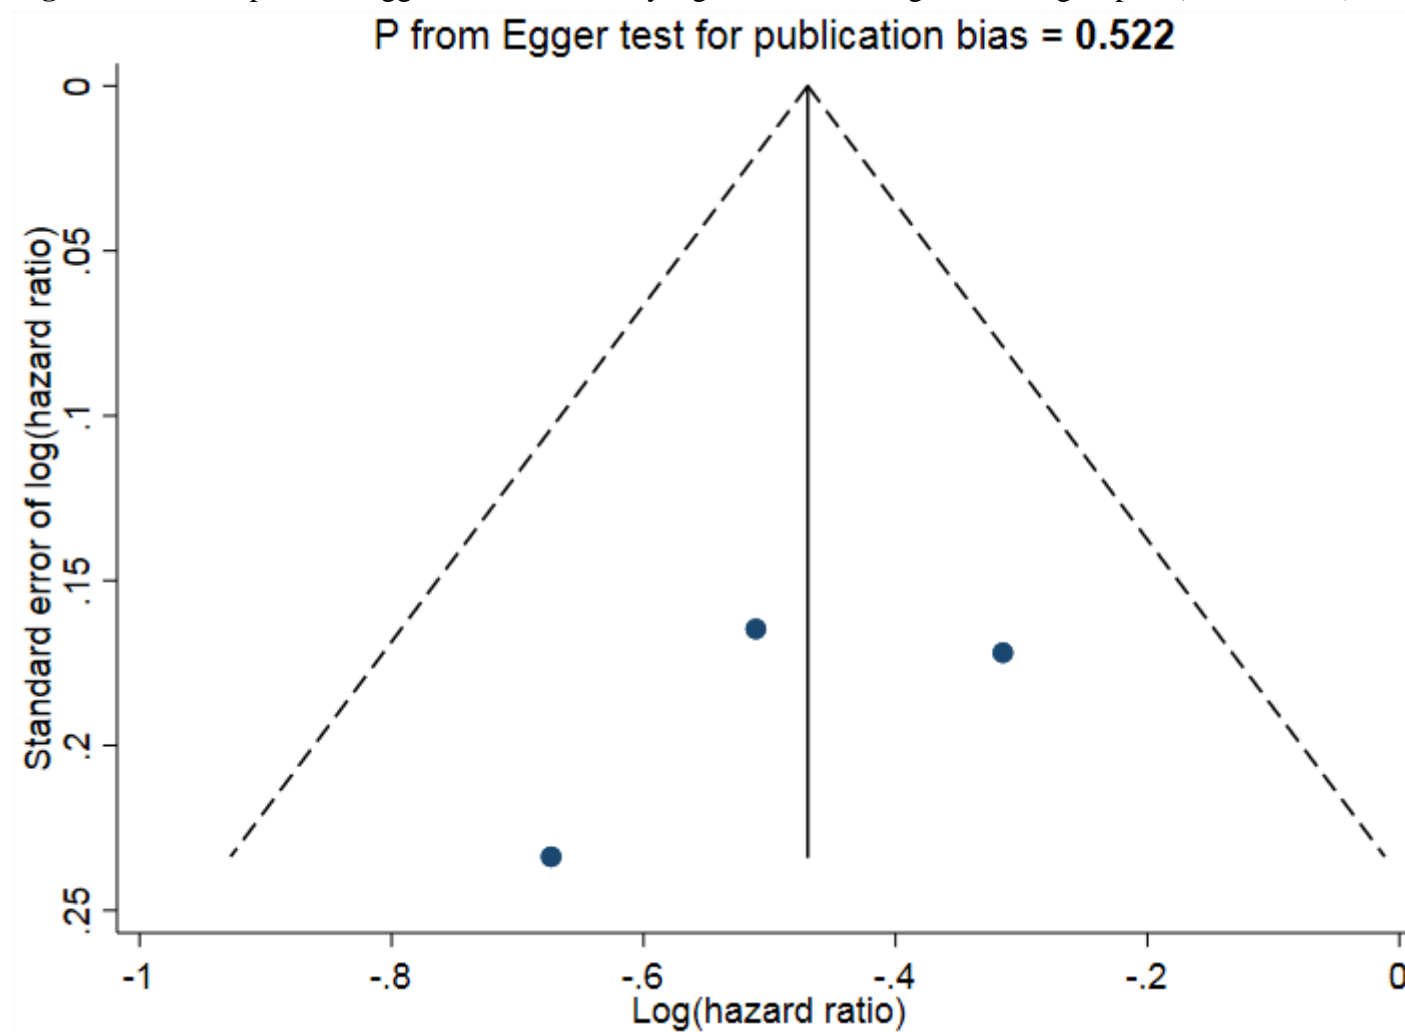

**Figure S3** Funnel plot and Egger test for clinically significant bleeding in the subgroup of (Age: <75years)

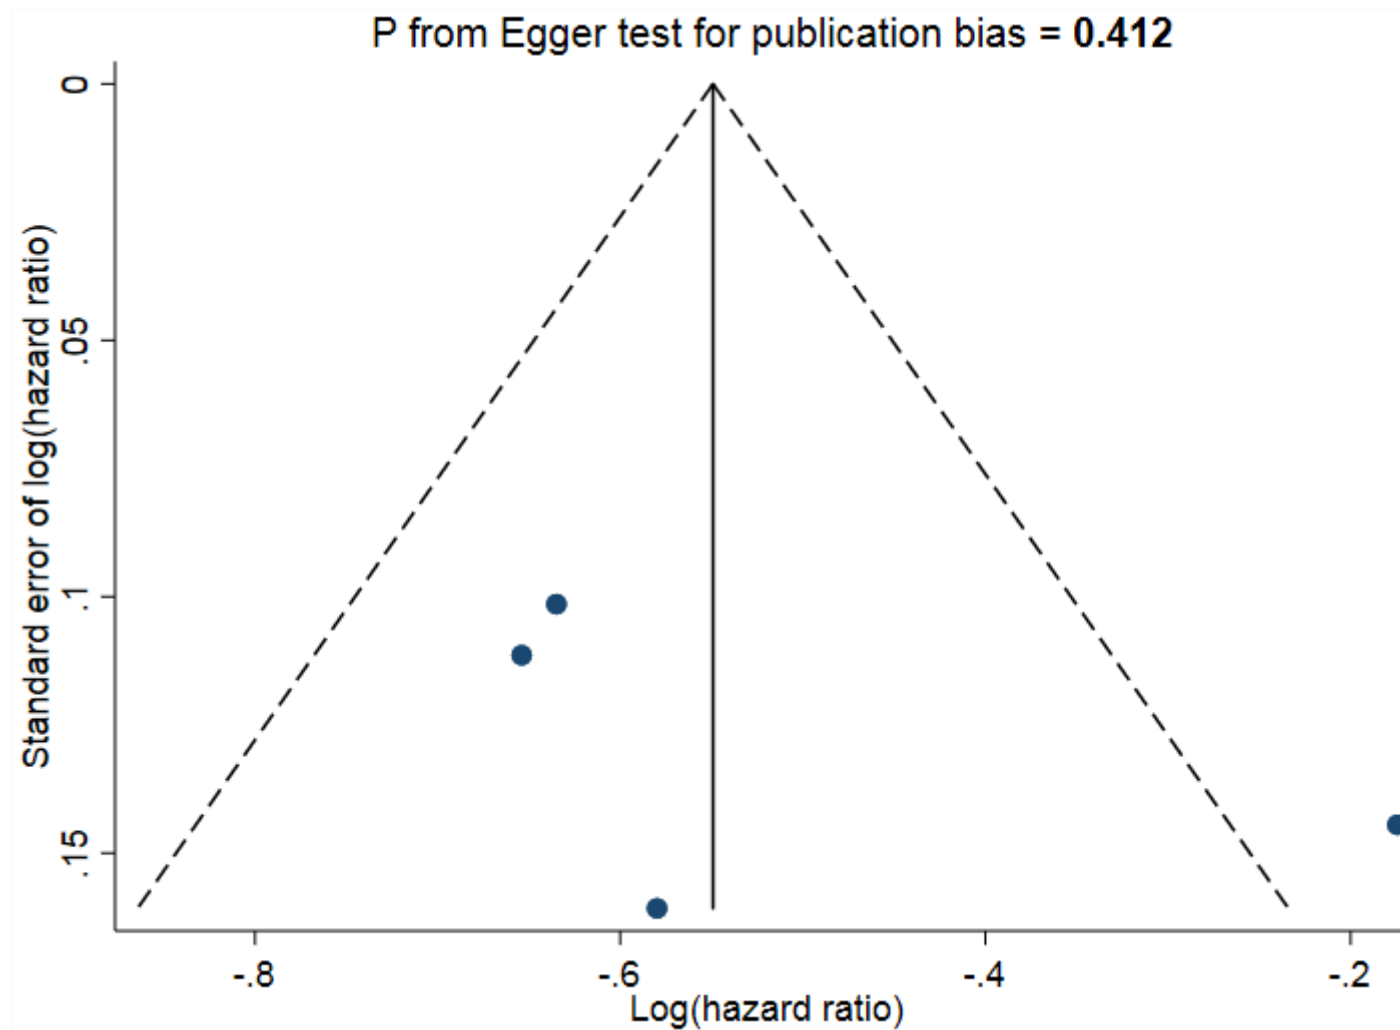

**Figure S4** Funnel plot and Egger test for clinically significant bleeding in the subgroup of (Age:  $\geq 75$  years)

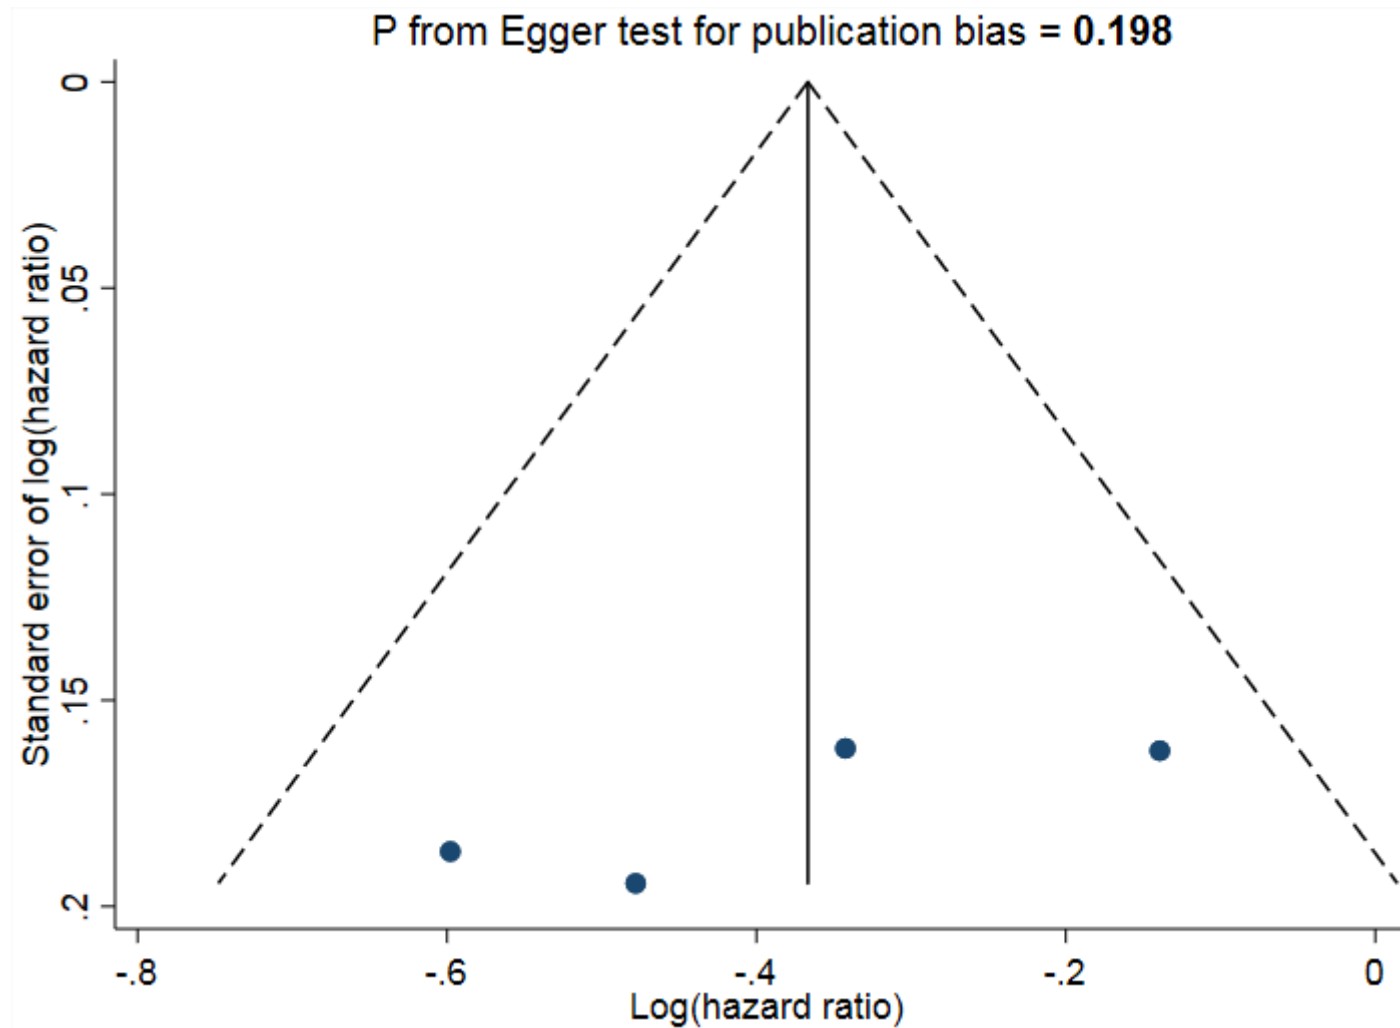

**Figure S5** Funnel plot and Egger test for clinically significant bleeding in the subgroup of (Race: White)

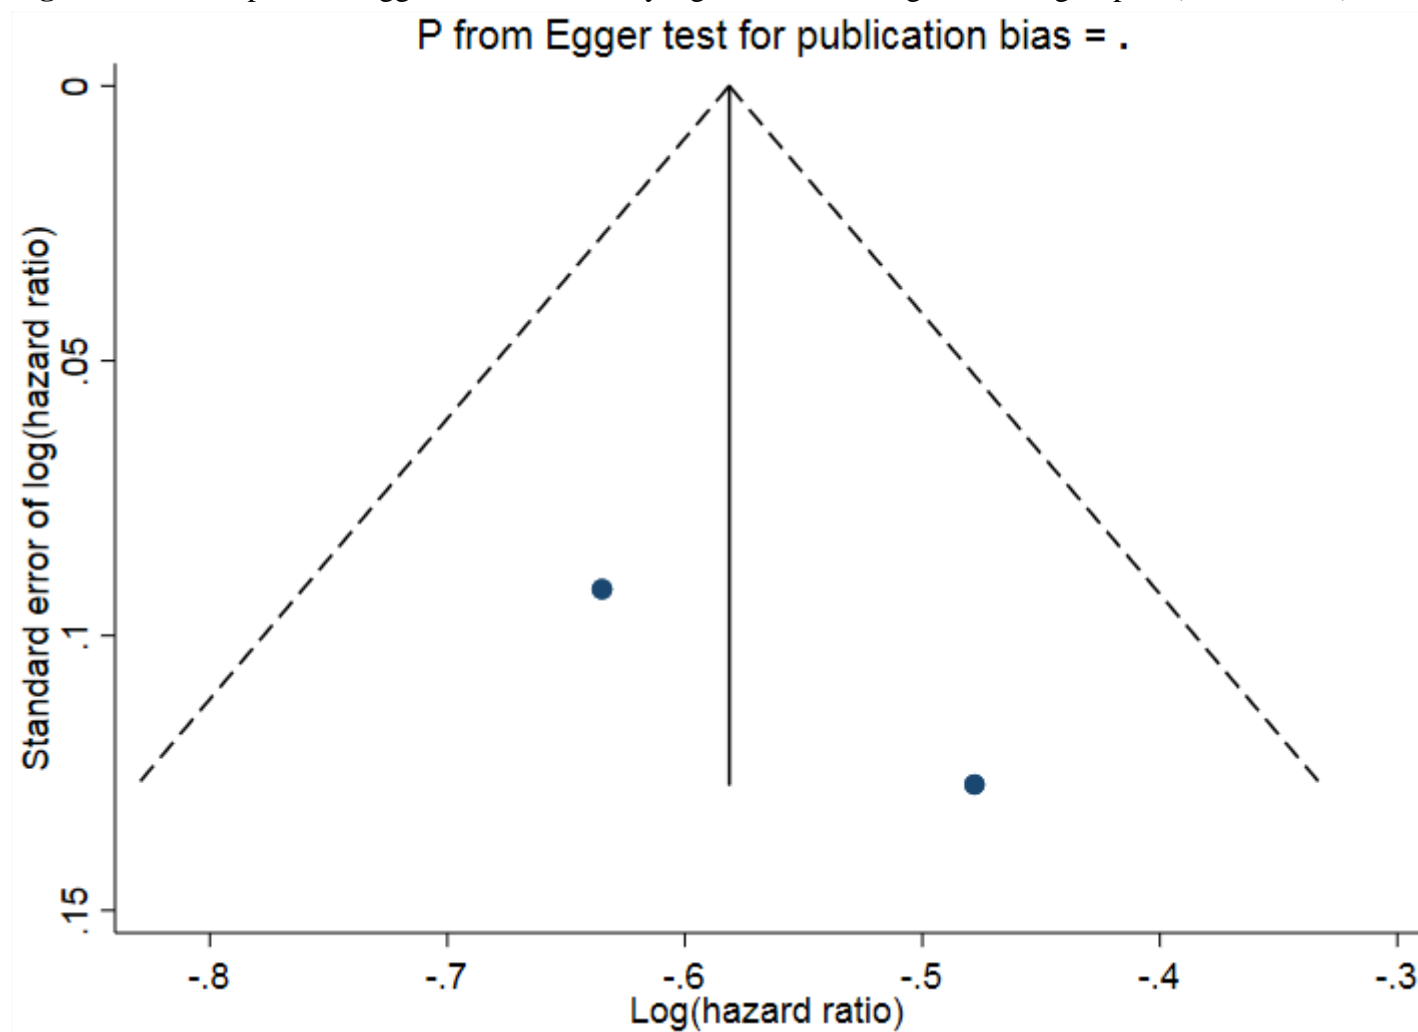

**Figure S6** Funnel plot and Egger test for clinically significant bleeding in the subgroup of (Race: Black)

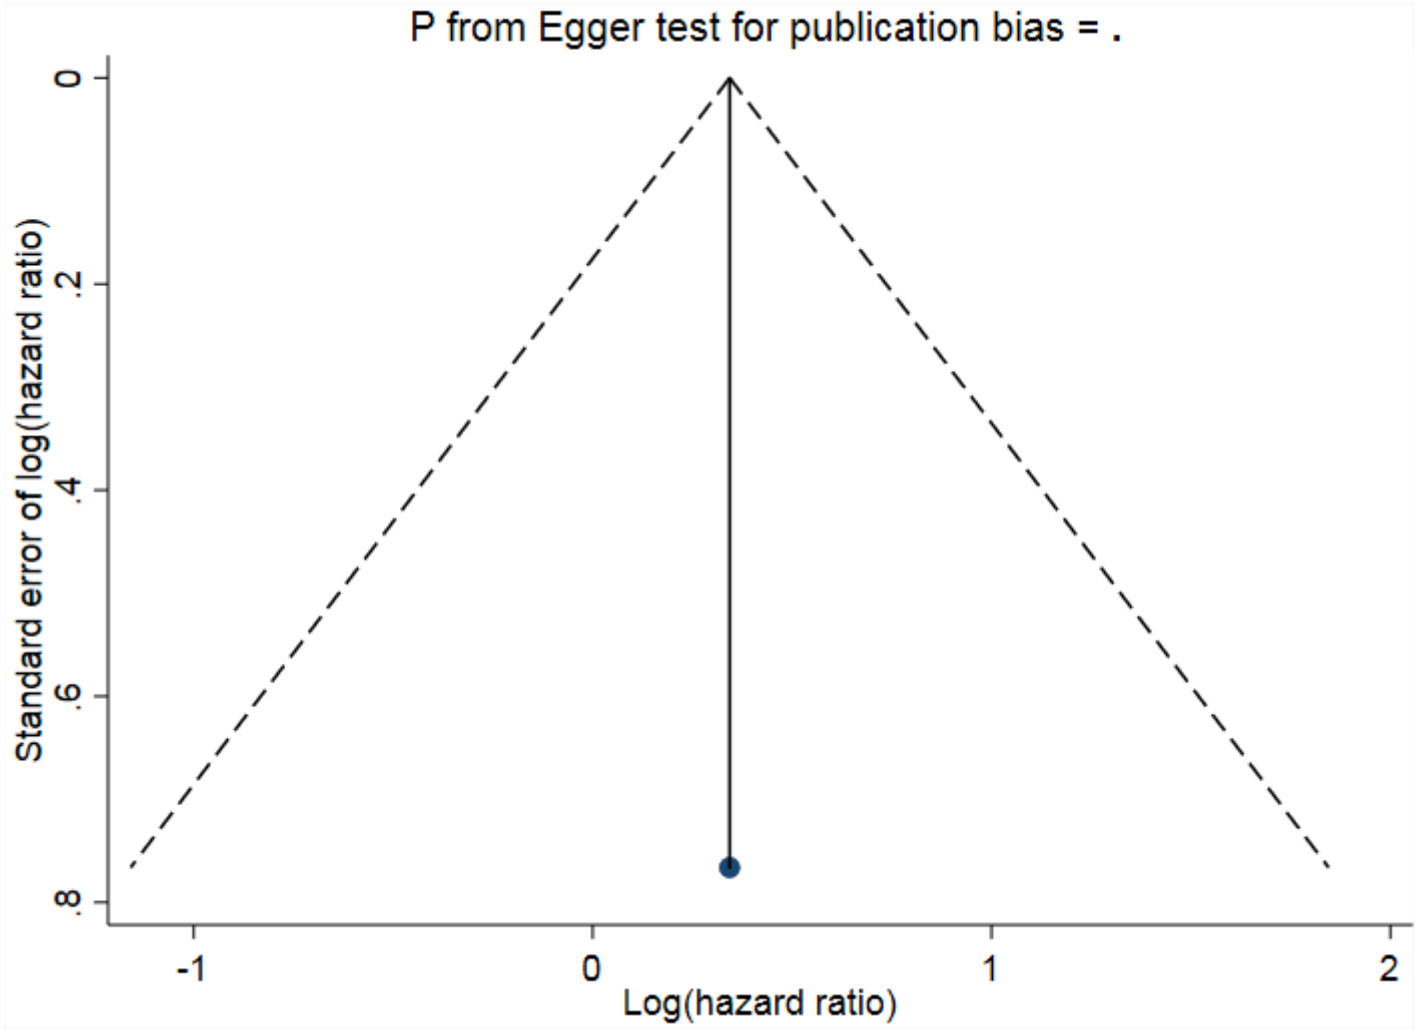

**Figure S7** Funnel plot and Egger test for clinically significant bleeding in the subgroup of (Race: Asian)

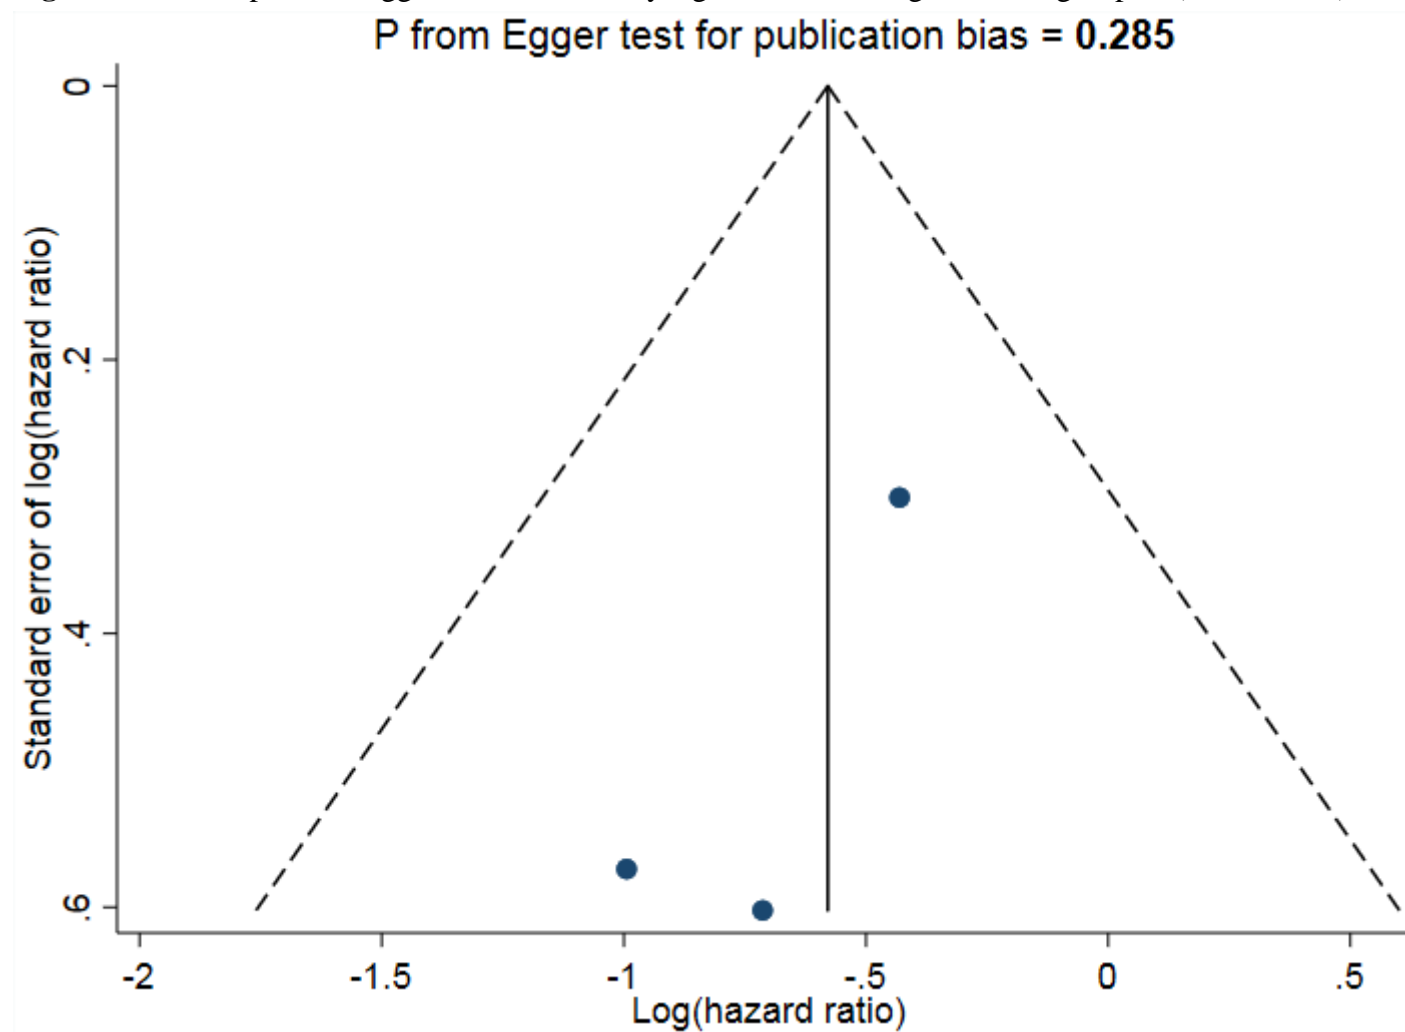

**Figure S8** Funnel plot and Egger test for clinically significant bleeding in the subgroup of (History of diabetes: No)

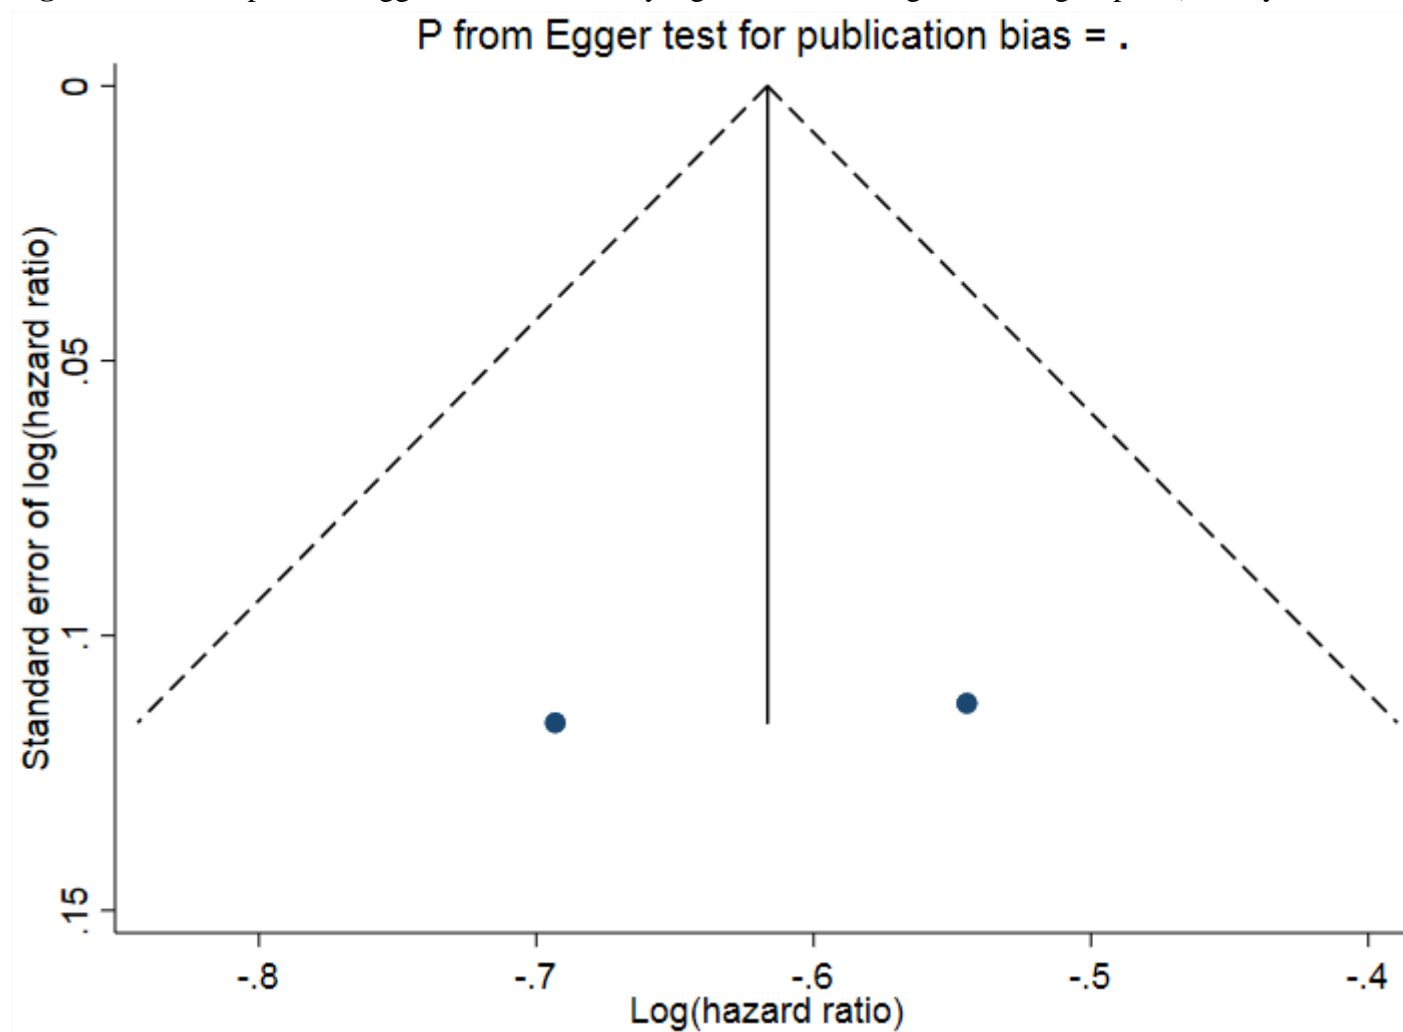

**Figure S9** Funnel plot and Egger test for clinically significant bleeding in the subgroup of (History of diabetes: Yes)

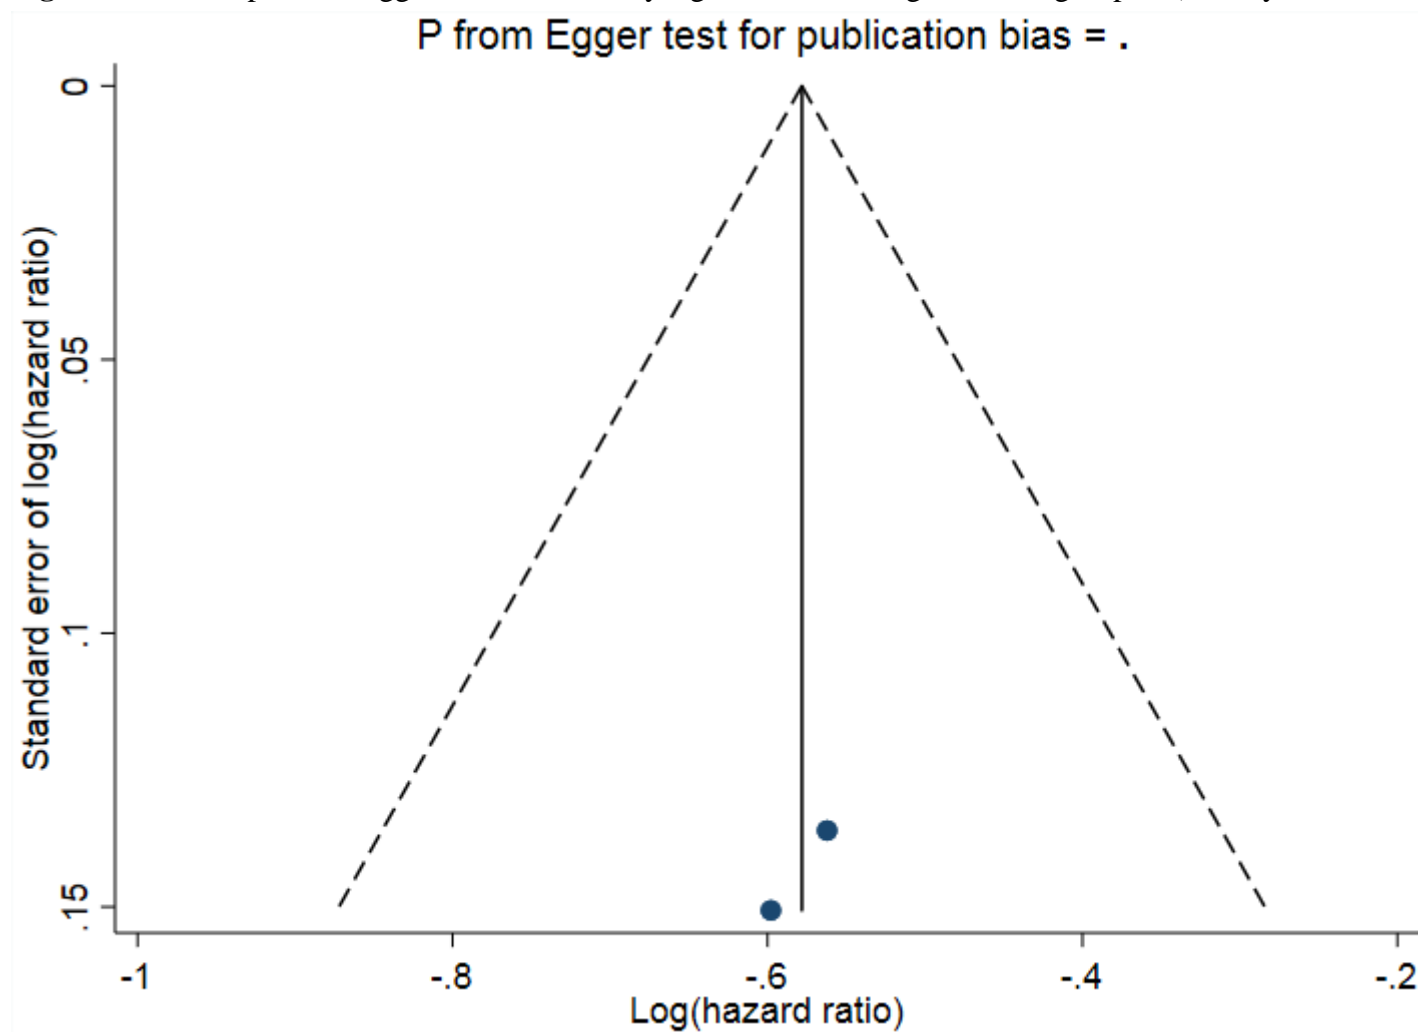

**Figure S10** Funnel plot and Egger test for clinically significant bleeding in the subgroup of (P2Y12 inhibitor: Clopidogrel)

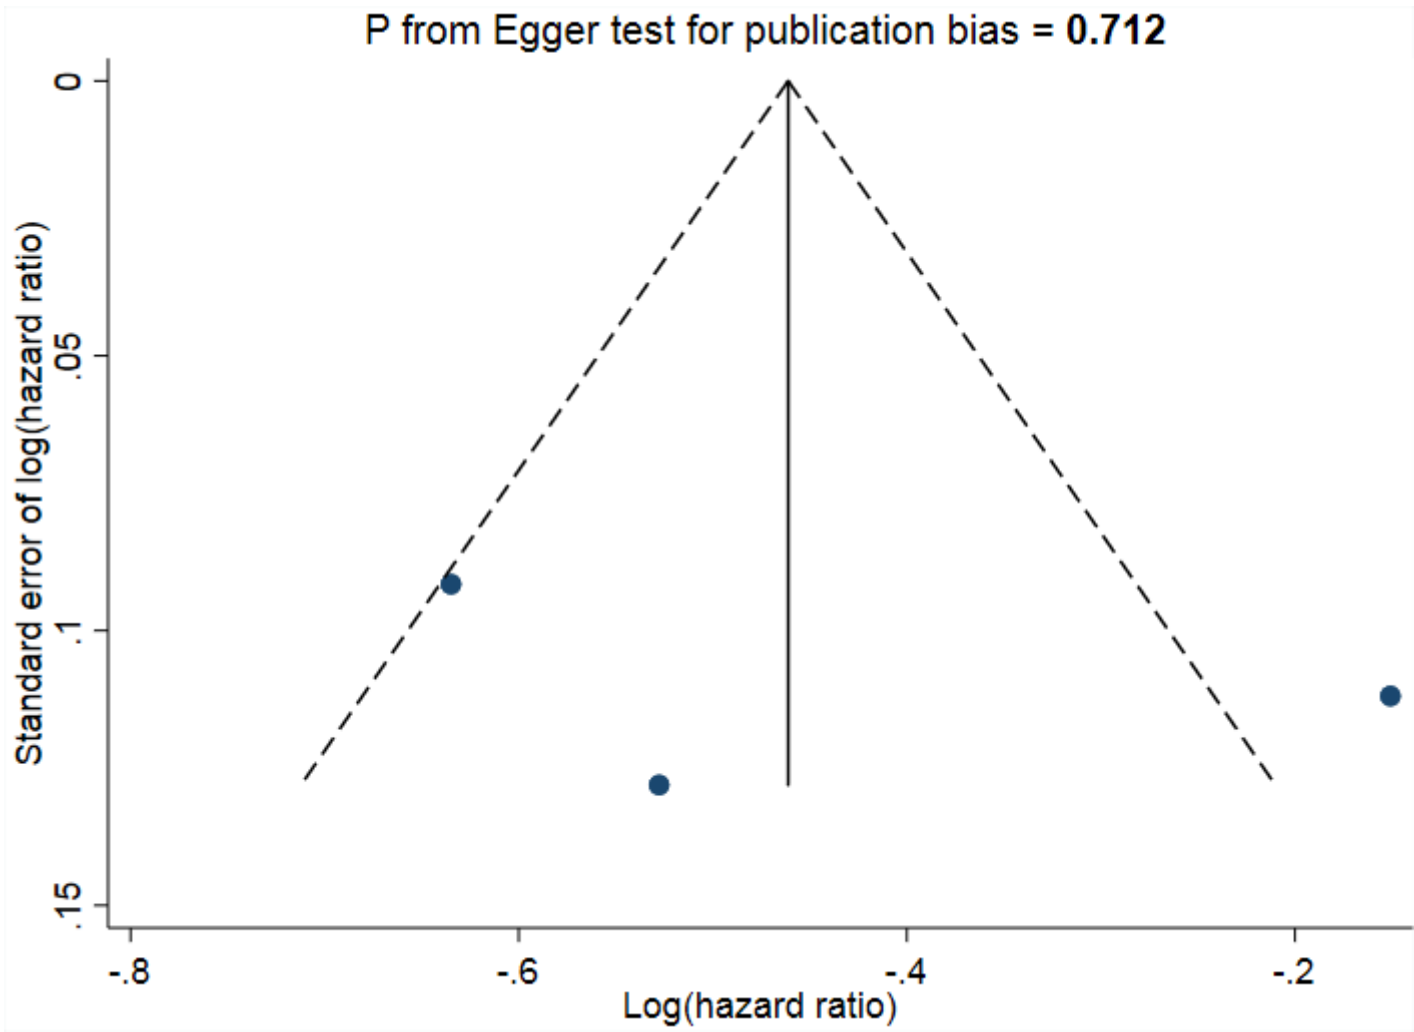

**Figure S11** Funnel plot and Egger test for clinically significant bleeding in the subgroup of (P2Y12 inhibitor: Prasugrel)

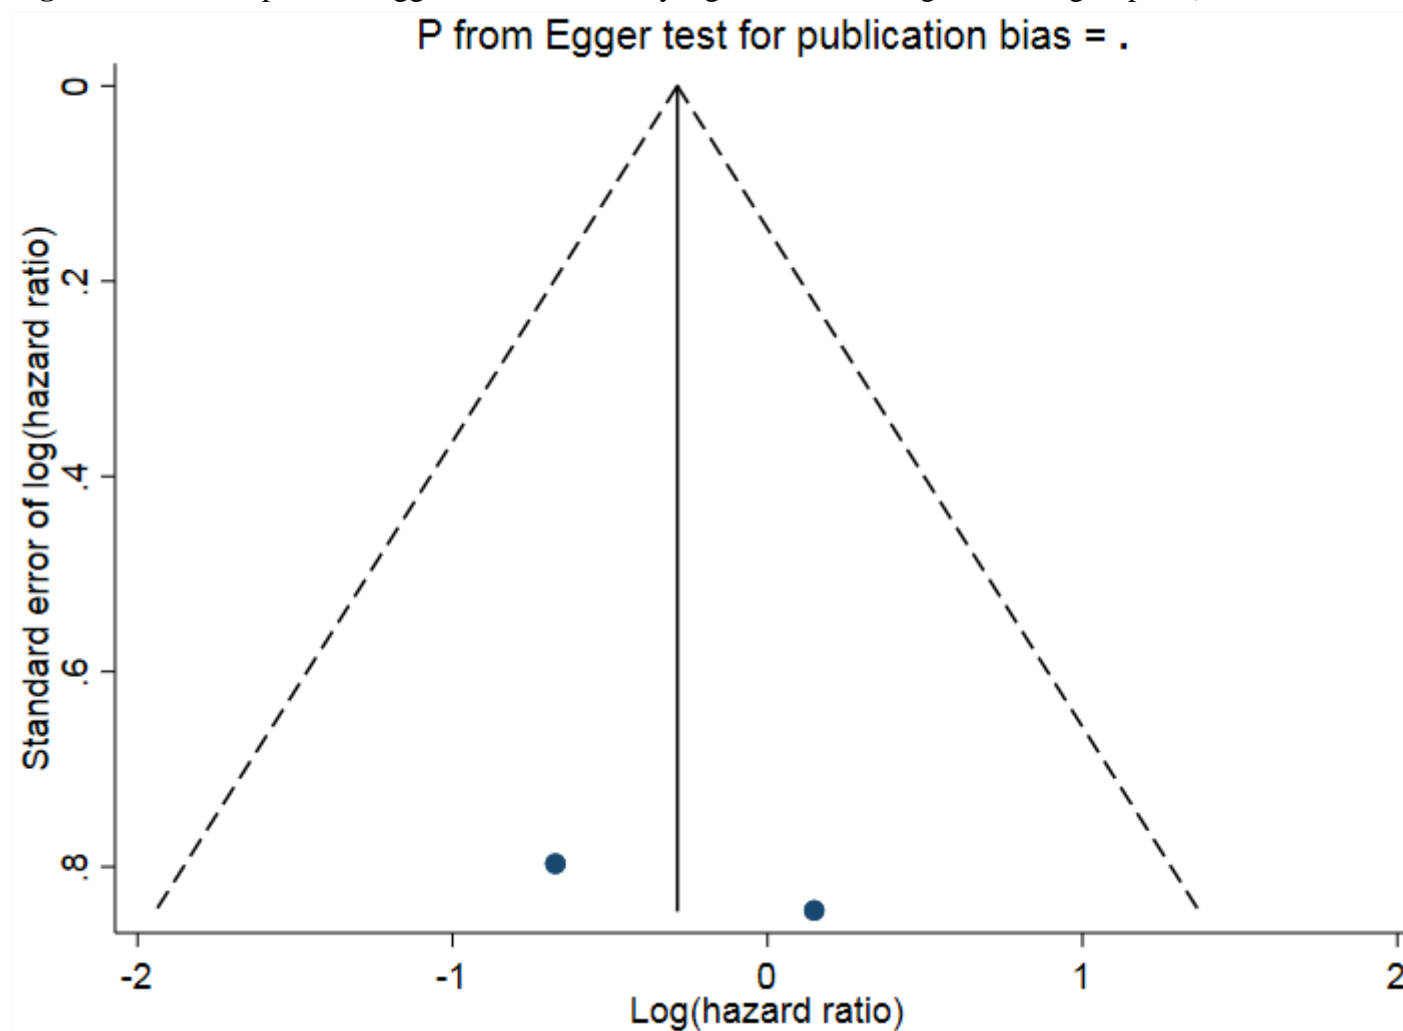

**Figure S12** Funnel plot and Egger test for clinically significant bleeding in the subgroup of (P2Y12 inhibitor: Ticagrelor)

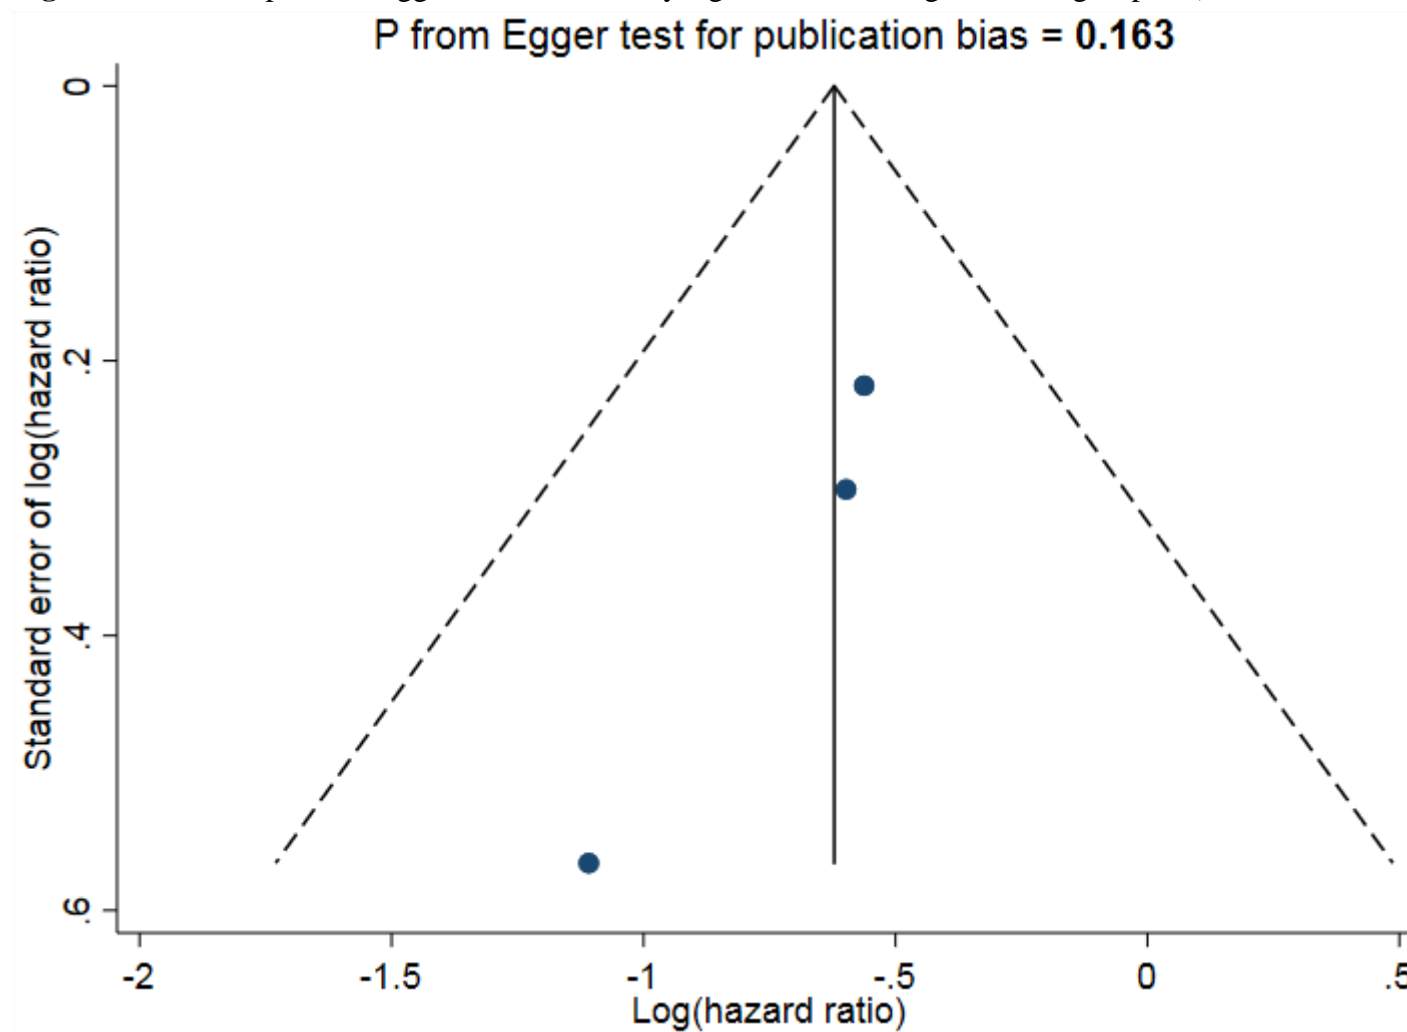

**Figure S13** Funnel plot and Egger test for major adverse cardiovascular events in the subgroup of (Sex: Male)

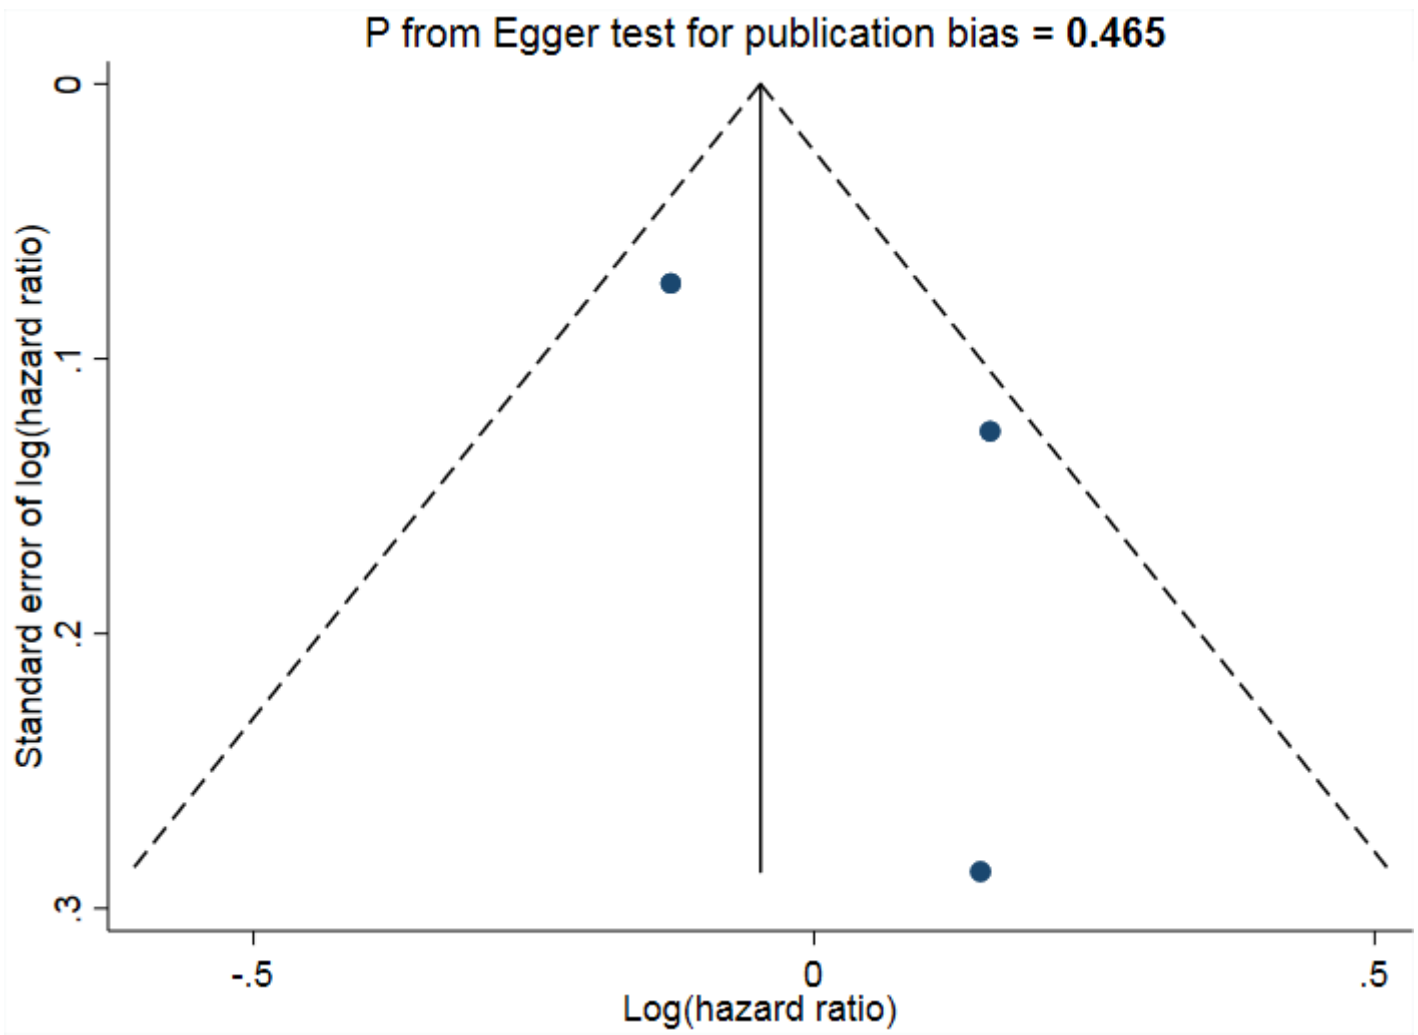

**Figure S14** Funnel plot and Egger test for major adverse cardiovascular events in the subgroup of (Sex: Female)

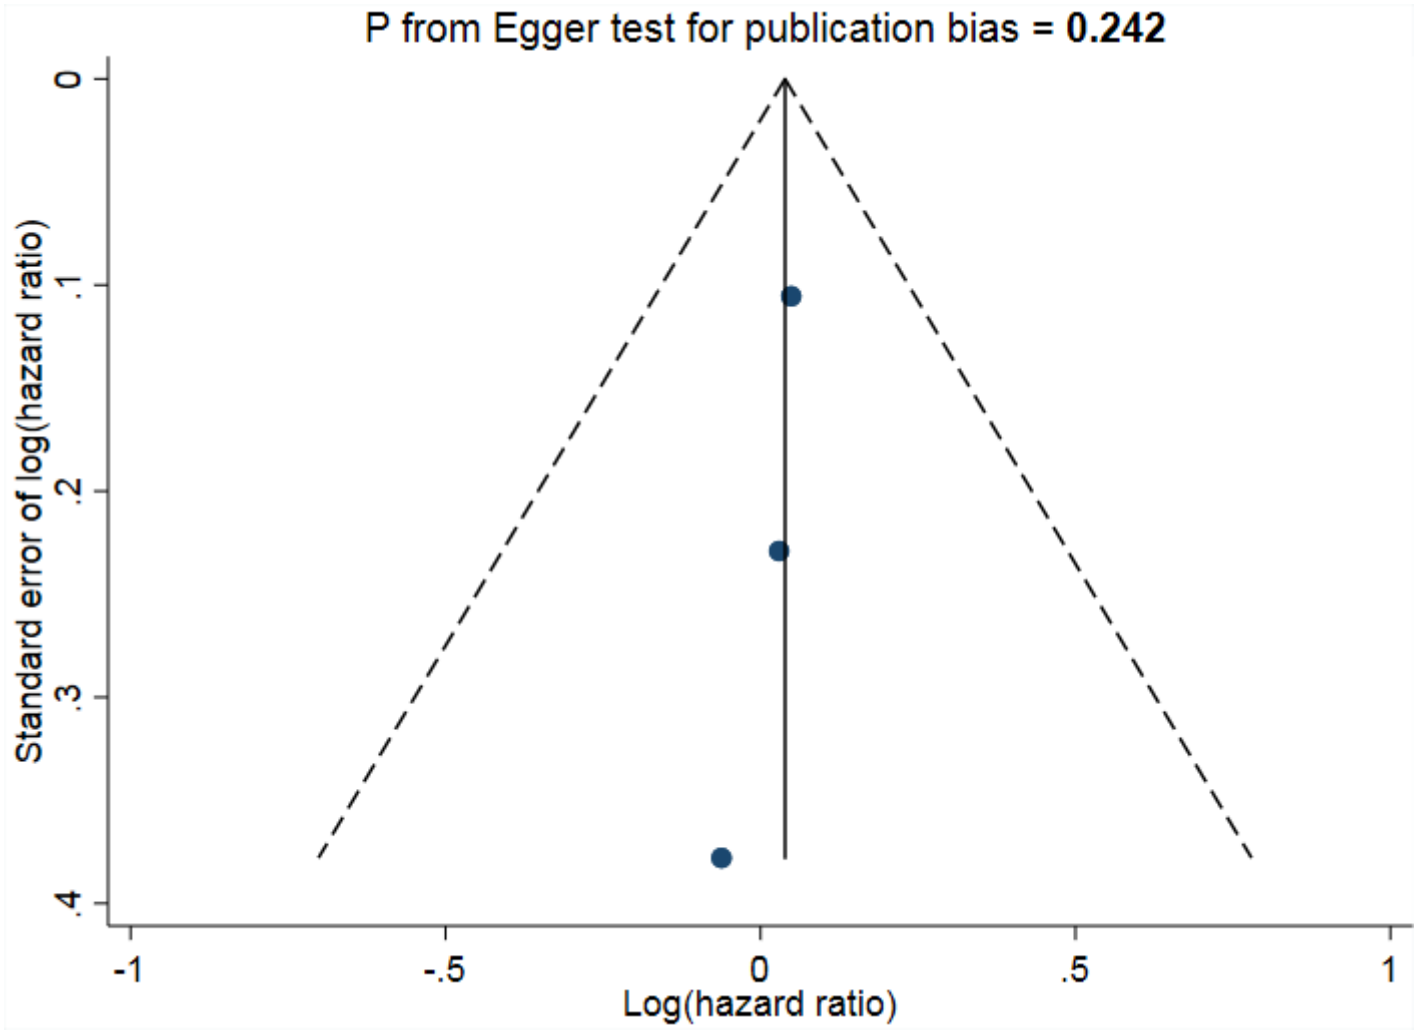

**Figure S15** Funnel plot and Egger test for major adverse cardiovascular events in the subgroup of (Age: <75years)

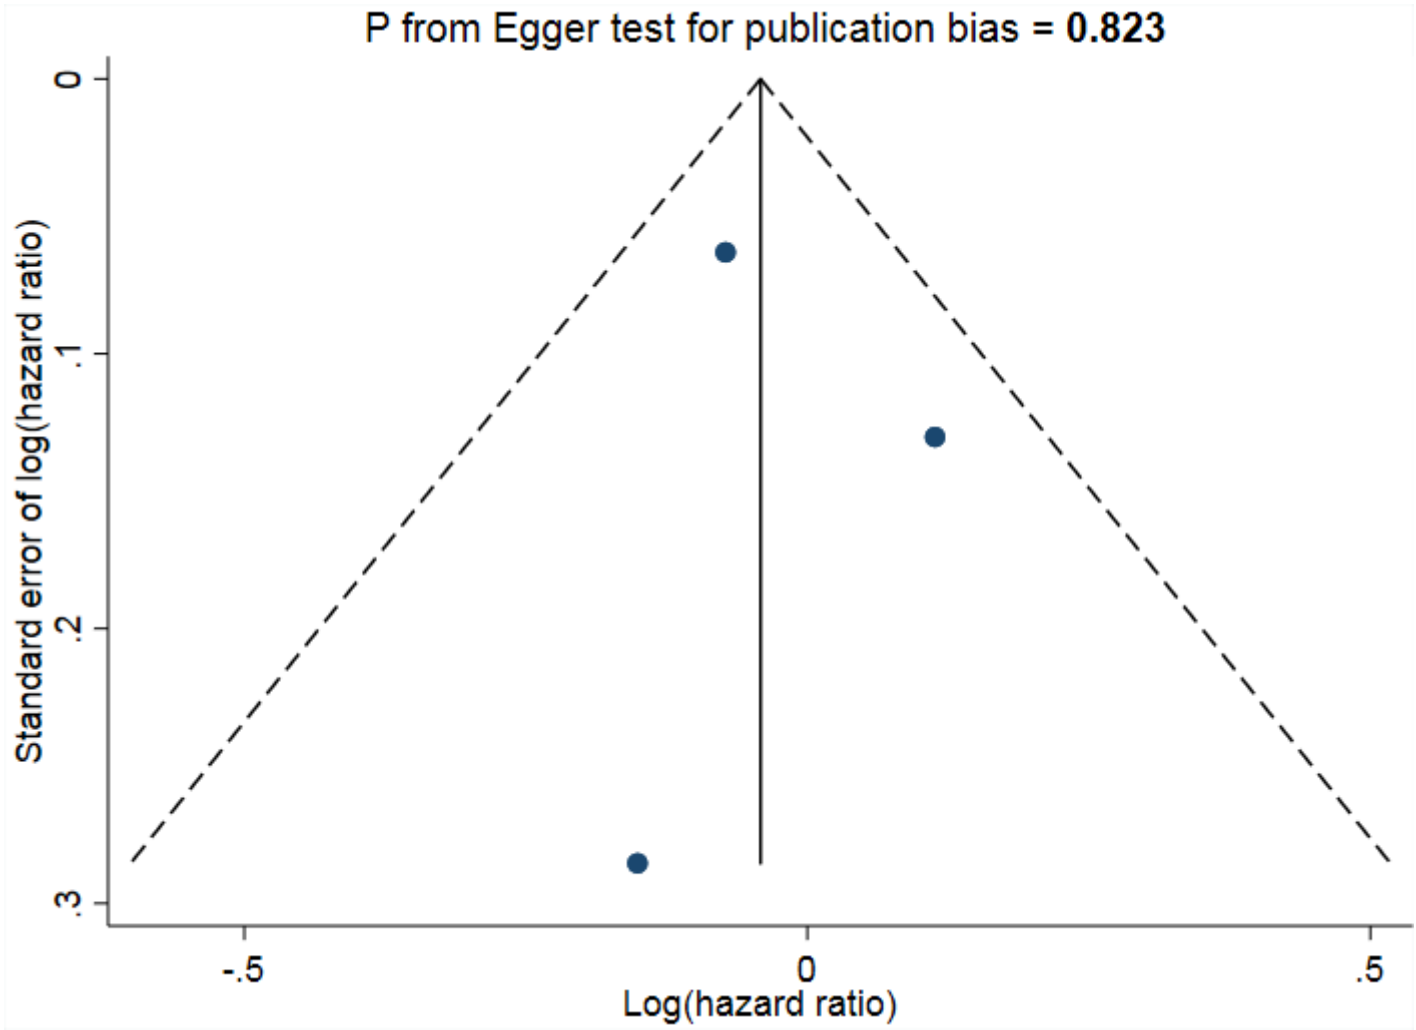

**Figure S16** Funnel plot and Egger test for major adverse cardiovascular events in the subgroup of (Age:  $\geq 75$  years)

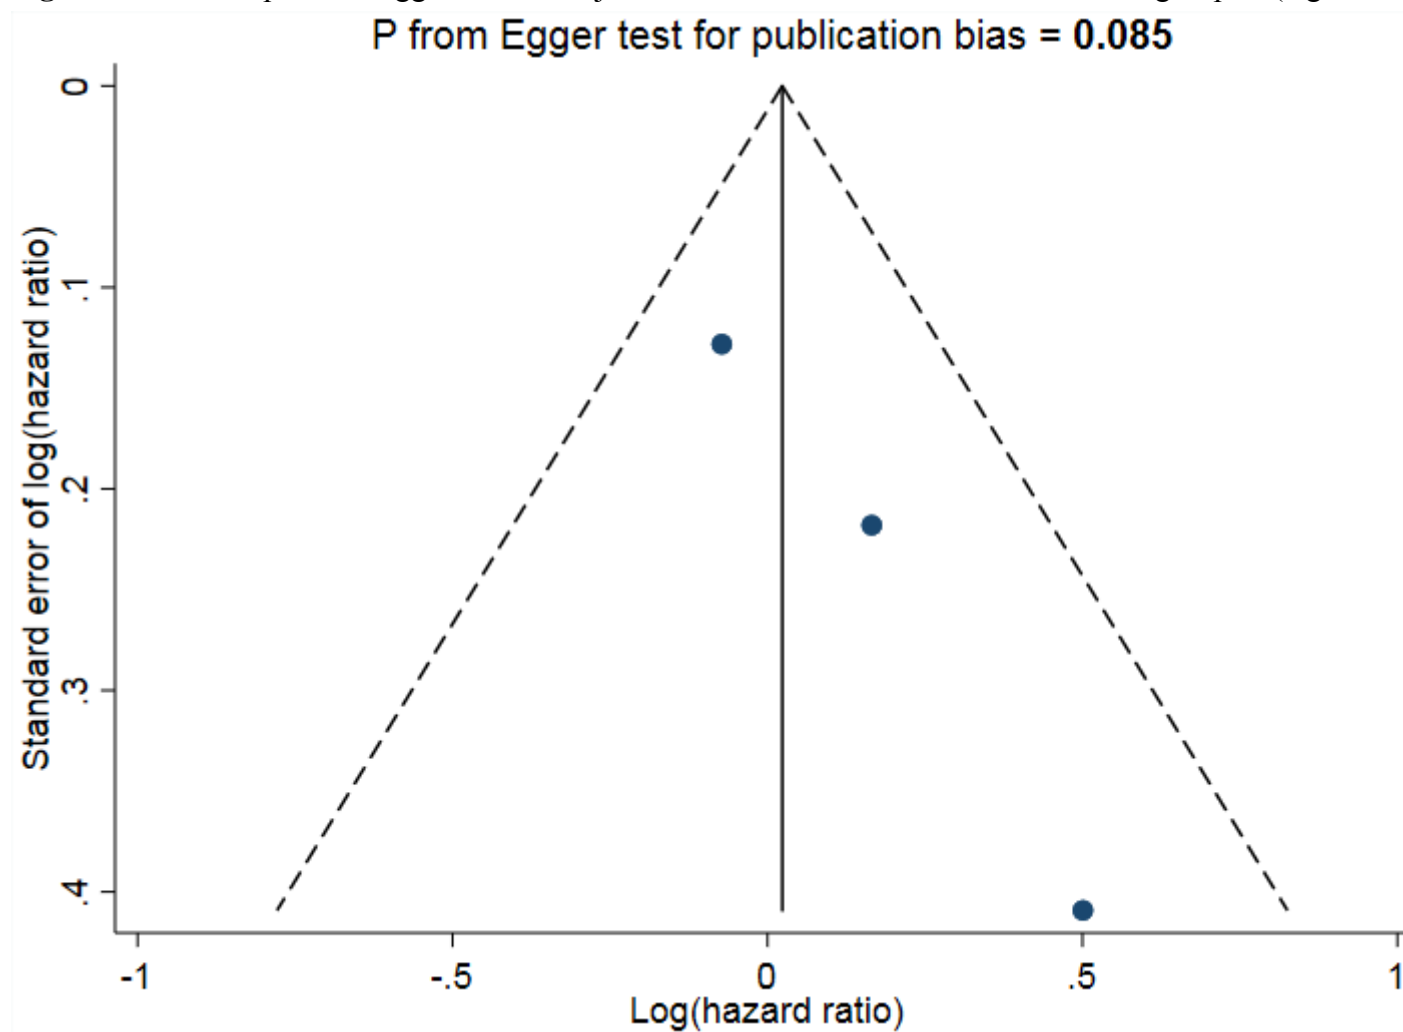

**Figure S17** Funnel plot and Egger test for major adverse cardiovascular events in the subgroup of (Race: White)

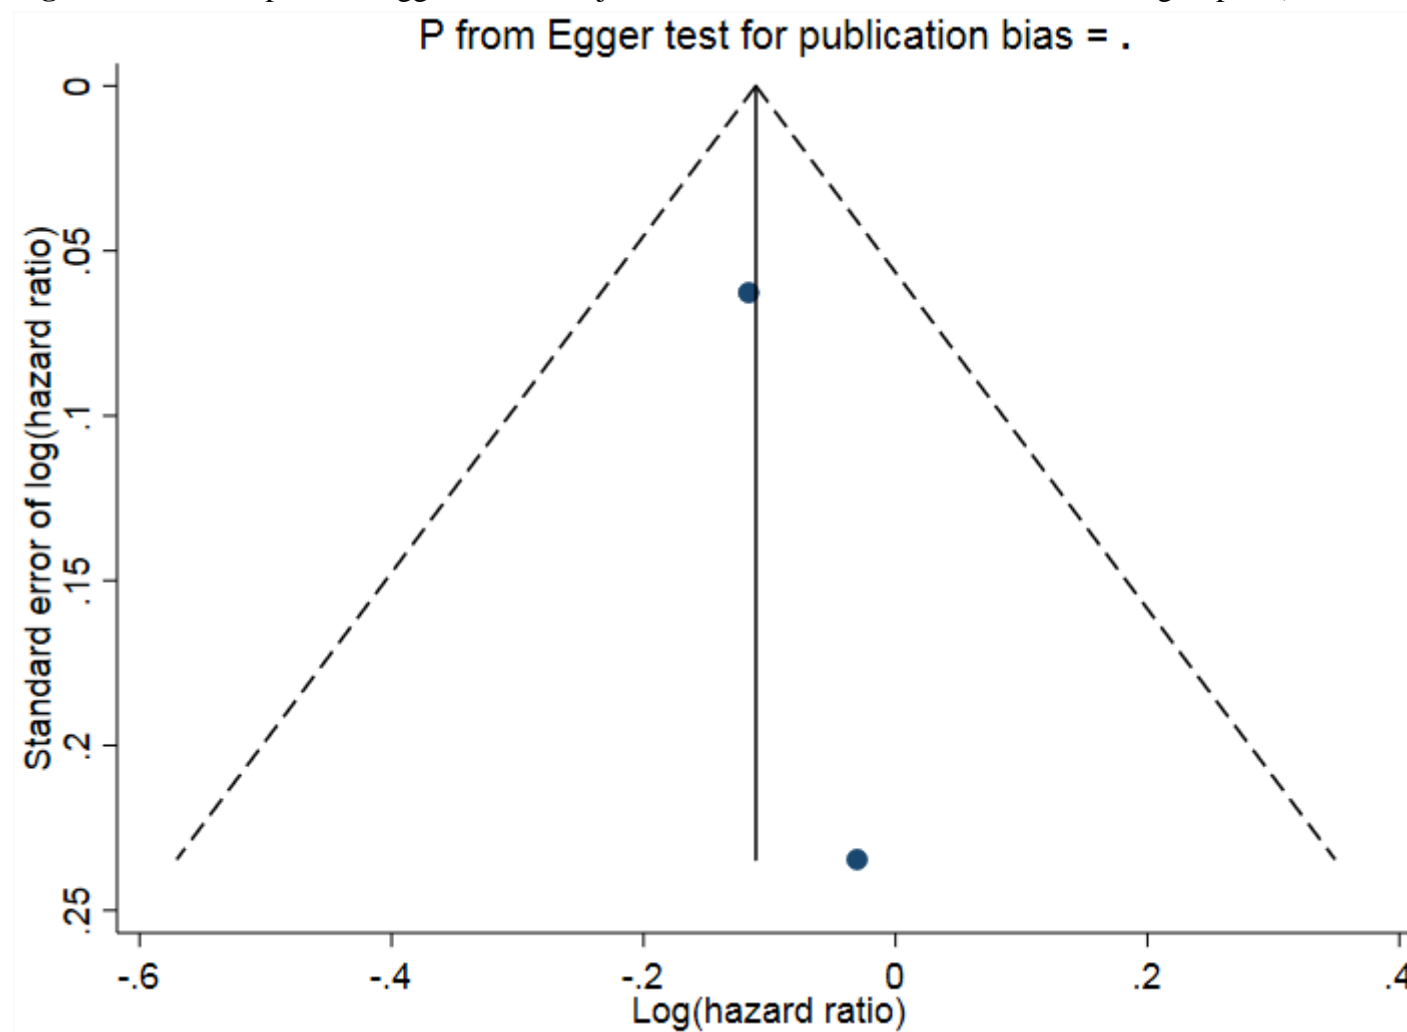

**Figure S18** Funnel plot and Egger test for major adverse cardiovascular events in the subgroup of (Race: Black)

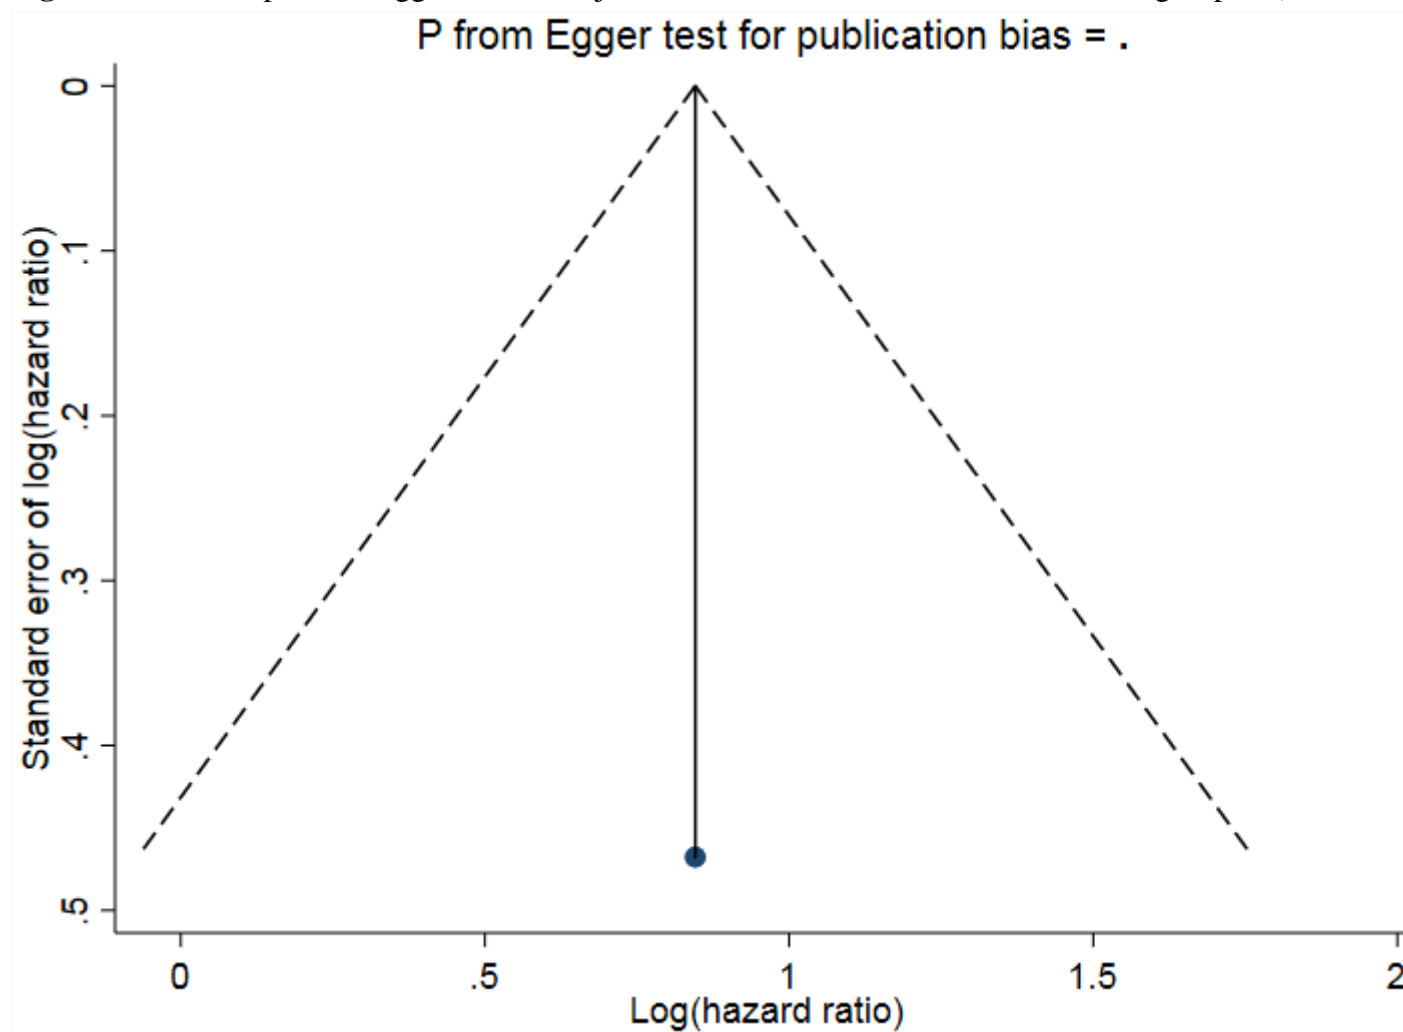

**Figure S19** Funnel plot and Egger test for major adverse cardiovascular events in the subgroup of (Race: Asian)

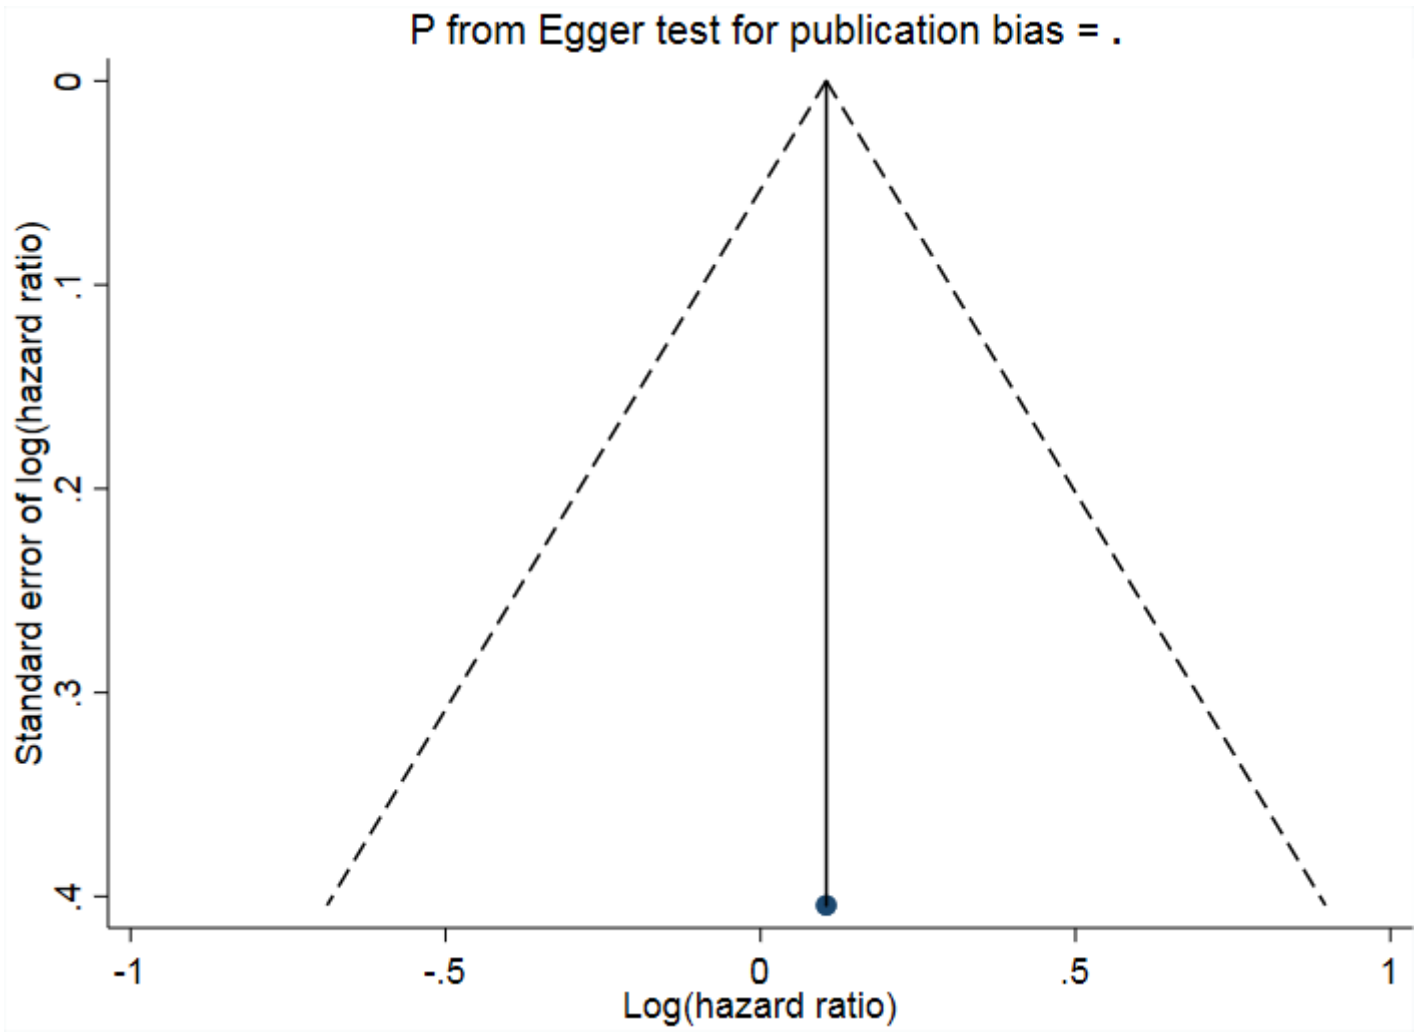

**Figure S20** Funnel plot and Egger test for major adverse cardiovascular events in the subgroup of (History of diabetes: No)

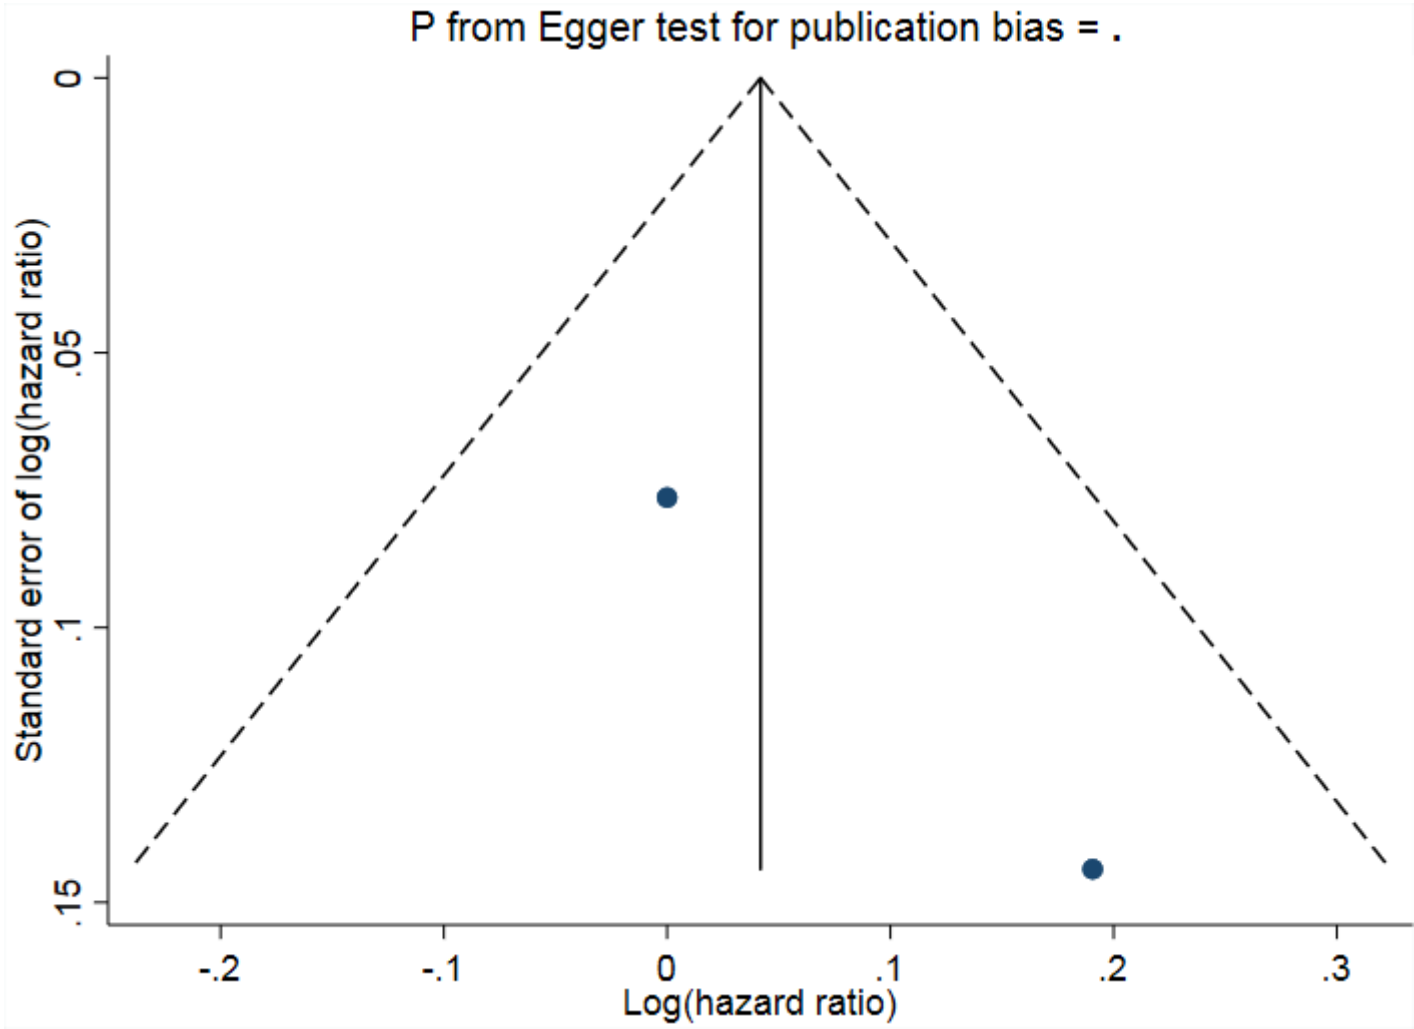

**Figure S21** Funnel plot and Egger test for major adverse cardiovascular events in the subgroup of (History of diabetes: Yes)

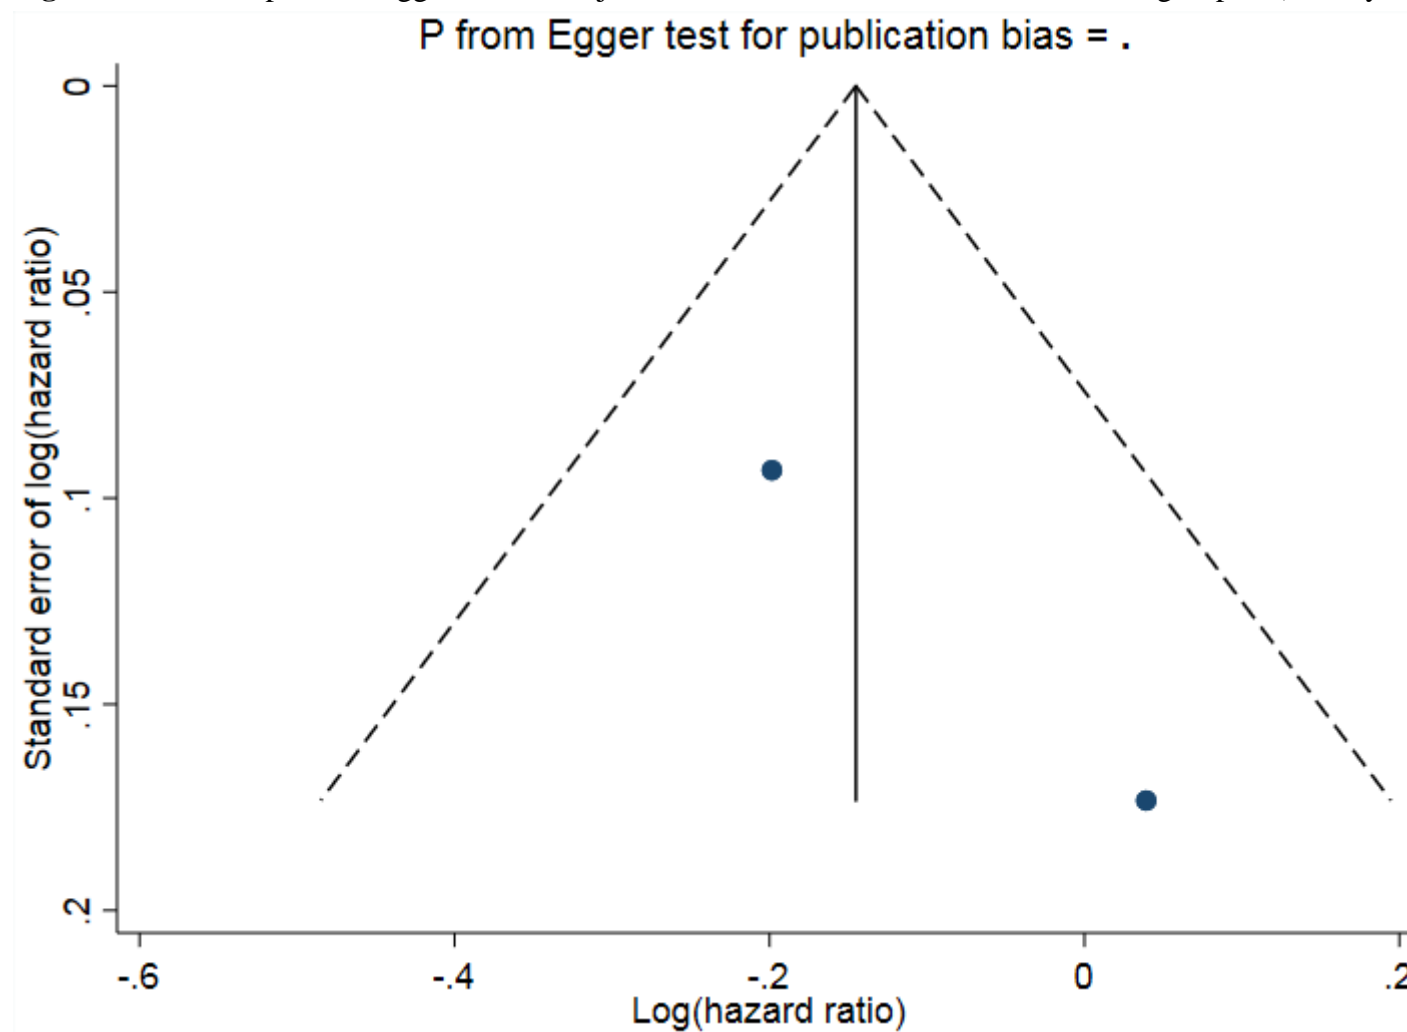

**Figure S22** Funnel plot and Egger test for major adverse cardiovascular events in the subgroup of (P2Y12 inhibitor: Clopidogrel)

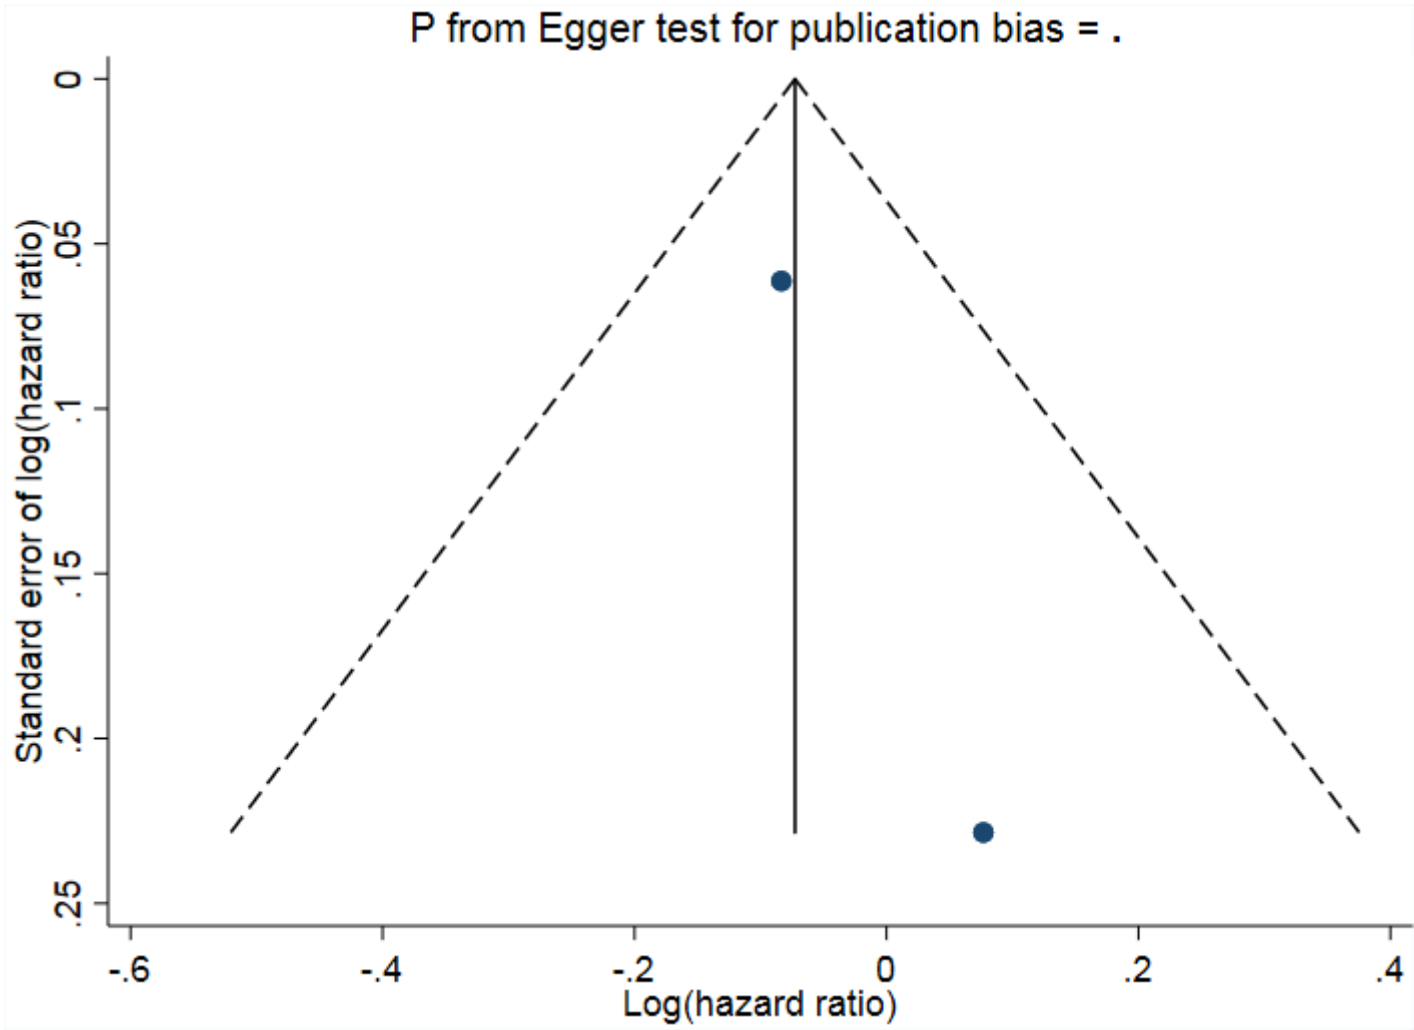

**Figure S23** Funnel plot and Egger test for major adverse cardiovascular events in the subgroup of (P2Y12 inhibitor: Prasugrel)

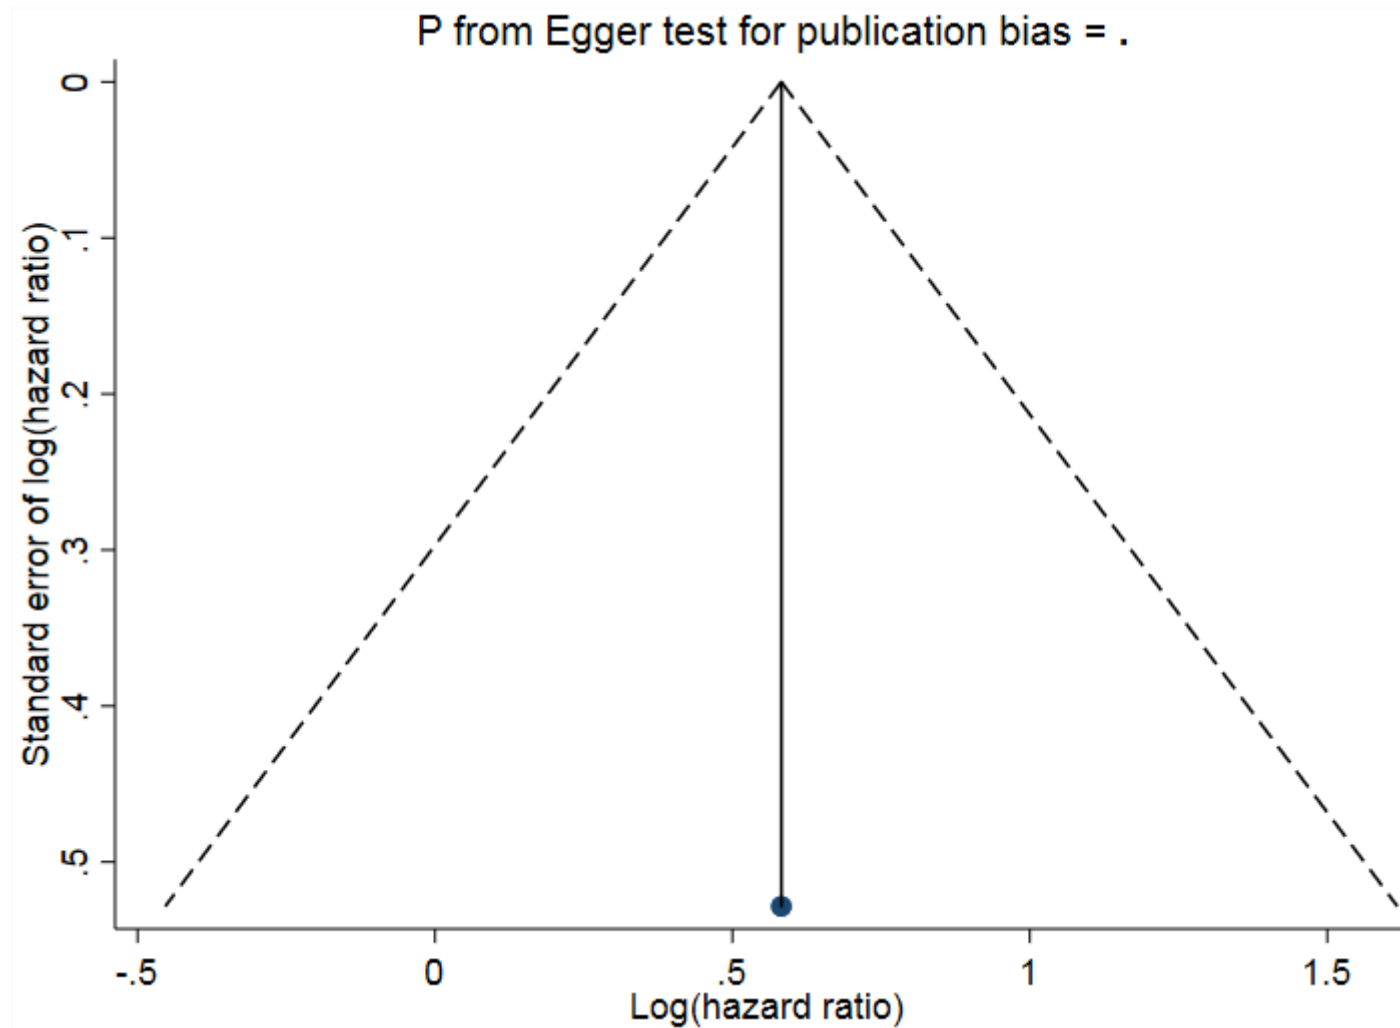

**Figure S24** Funnel plot and Egger test for major adverse cardiovascular events in the subgroup of (P2Y12 inhibitor: Ticagrelor)

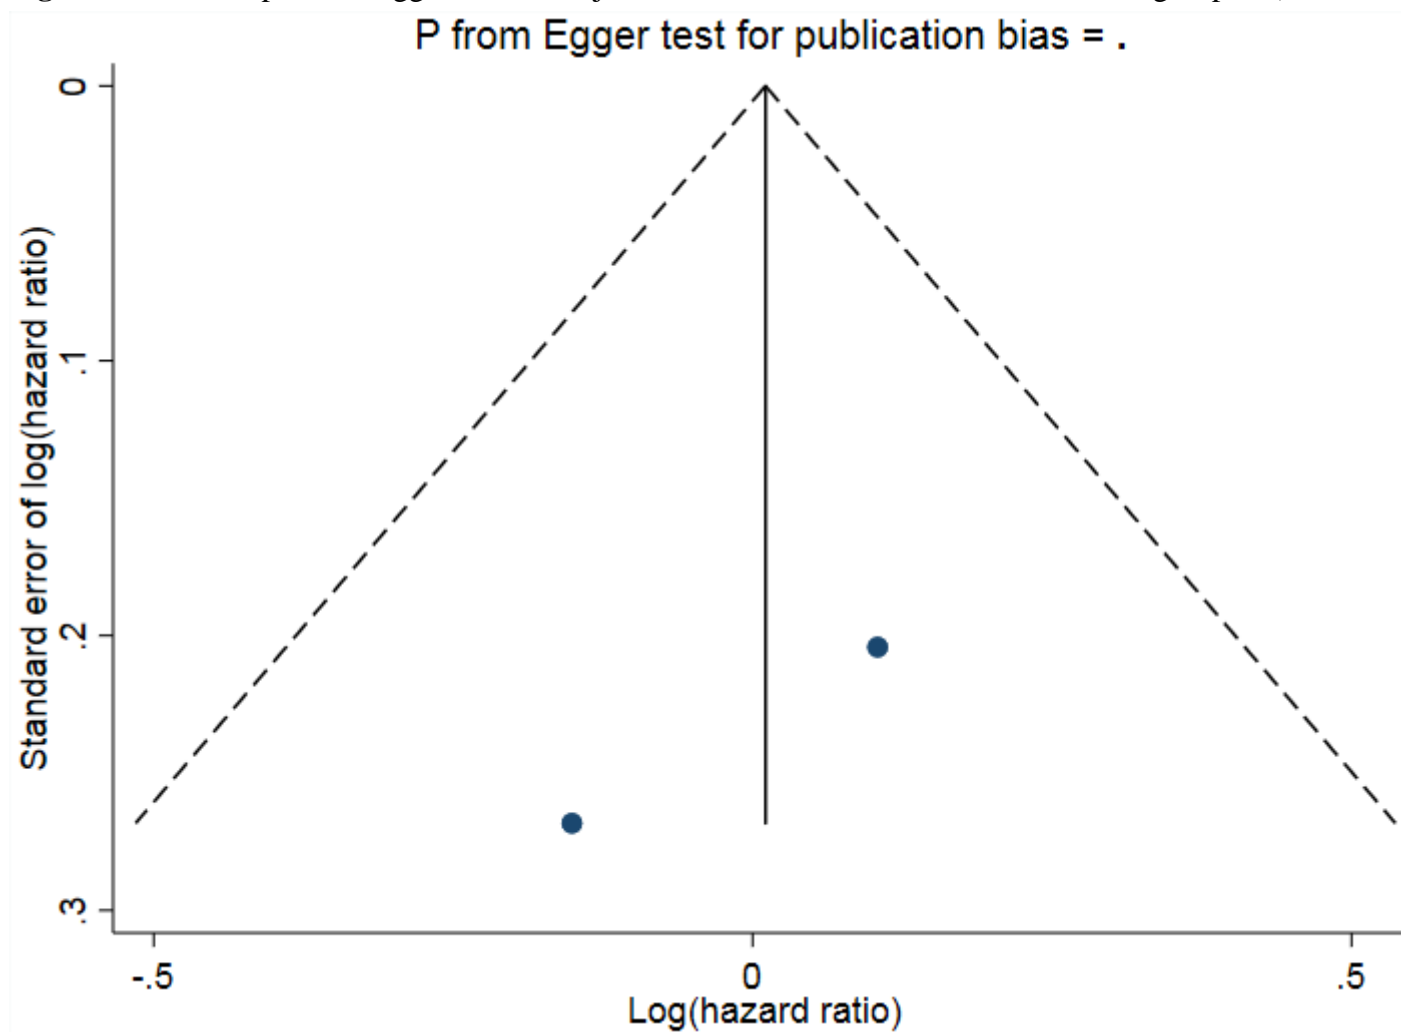

Supplement: medi-100-e24188-s003.pdf [file medi-100-e24188-s003.pdf]
